# Supplementary material for: Gene therapy using genetically modified lymphocytes targeting VEGFR-2 inhibits the growth of vascularized syngenic tumors in mice
Source: JCI journal article supplement (doi:10.1172/jci43490), 2010-11-01
Supplement: sd1 [file 1]

# Supplemental Figure S1

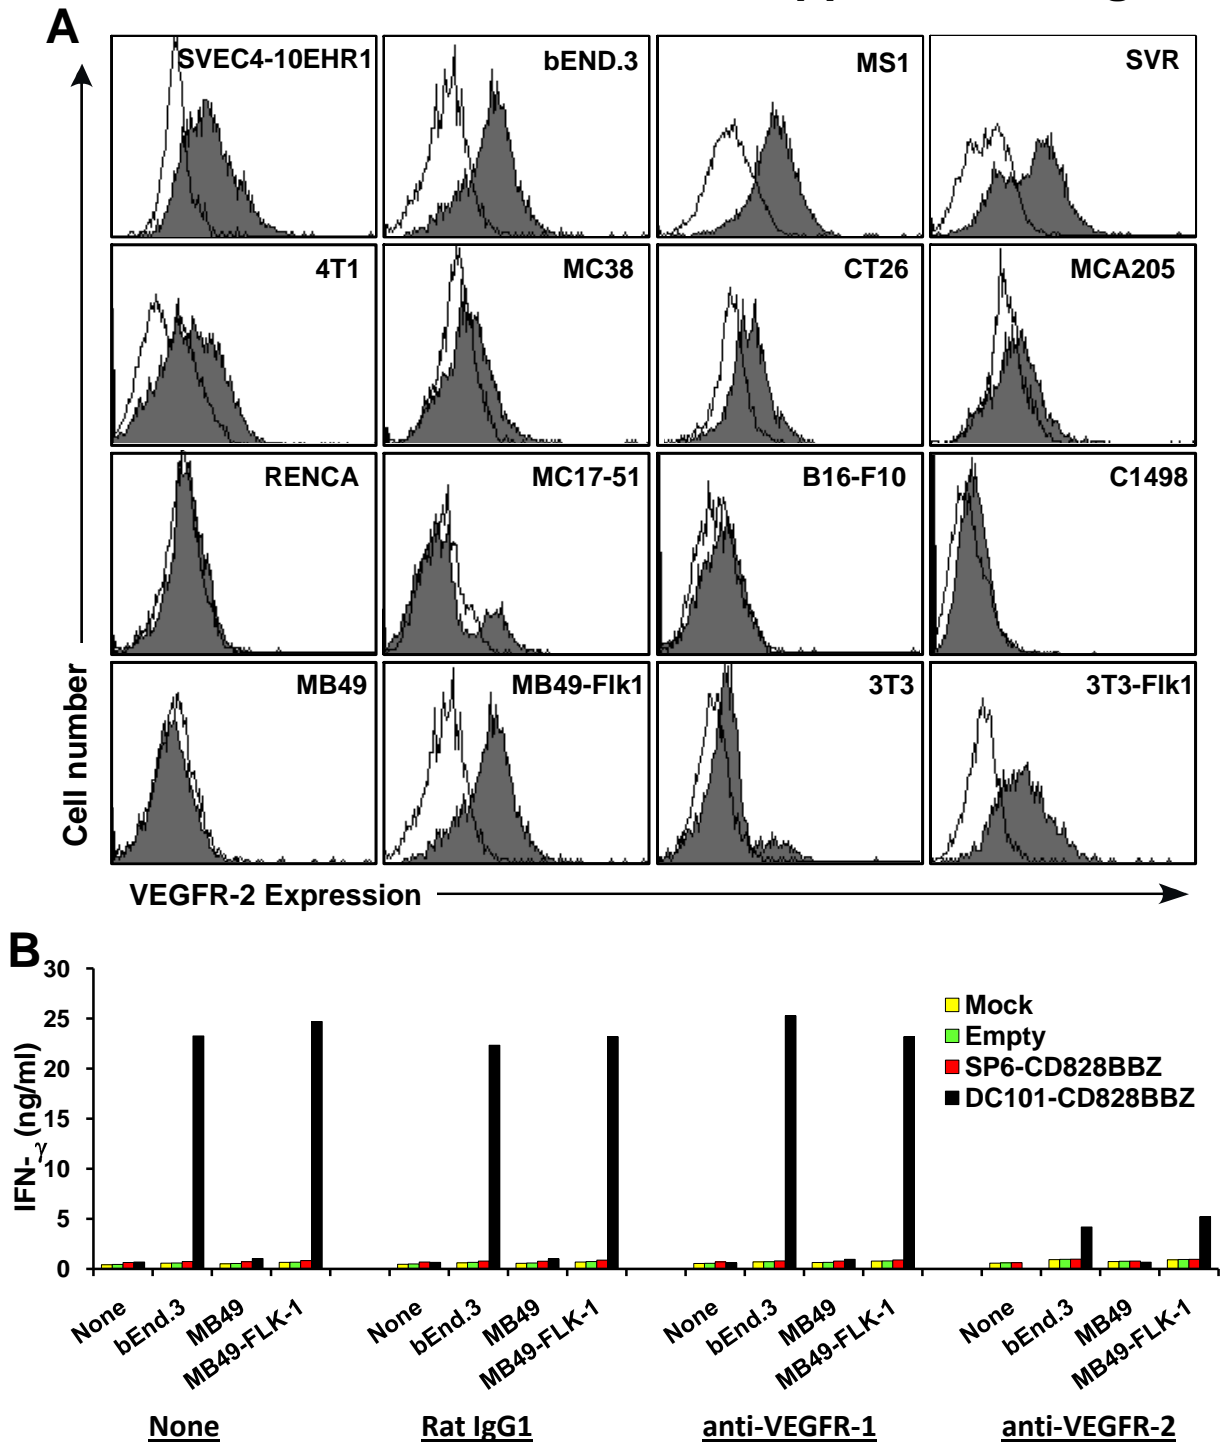

**Figure S1**

**VEGFR-2 CAR transduced T cells specifically bind to VEGFR-2 on endothelial cells (A)** Detection of cell surface expression of VEGFR-2 on mouse endothelial cells and tumor cells. Indicated mouse cell lines were incubated with PE-labeled rat anti-mouse antibody (BD biosciences) or isotype control antibody rat IgG2a,  $\kappa$  and analyzed by FACS. Filled histogram, VEGFR-2 specific staining; open histogram, staining with IgG2a,  $\kappa$ . Results shown are representative of two experiments. **(B)** Specificity of Indicated target cells were incubated with 10  $\mu$ g/ml of either rat IgG1, anti-mouse VEGFR-1 antibody, or the anti-mouse VEGFR-2 antibody (DC101) at 37°C for 1 hour and then cocultured with empty vector, SP6-CD828BBZ CAR, or DC101-CD828BBZ encoding retroviral vector or mock transduced primary mouse T cells. Supernatants were harvested 24 hours later and assessed for IFN- $\gamma$  by ELISA.

## Supplemental Figure S2

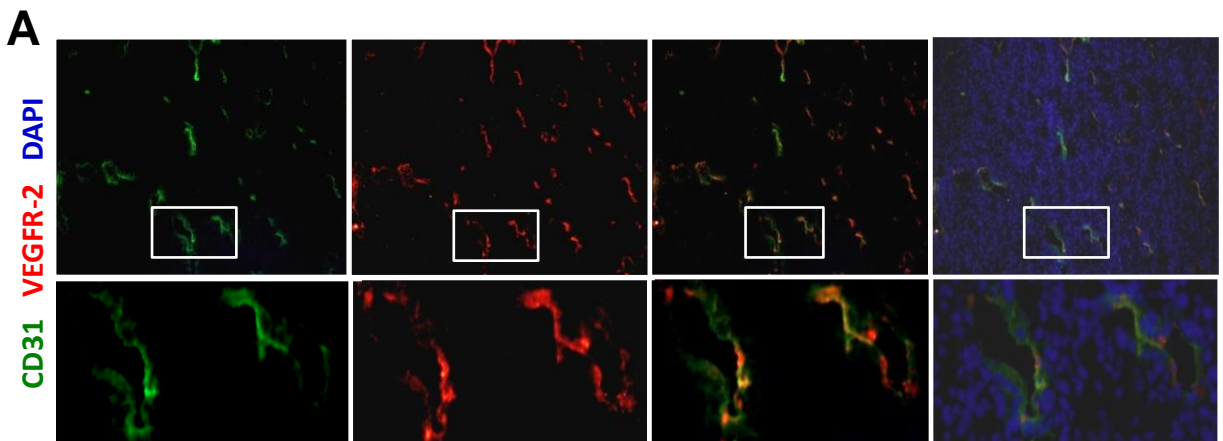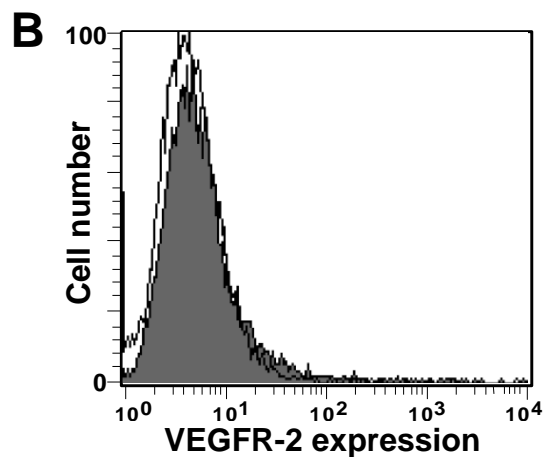

### Figure S2

**VEGFR-2 expression is restricted to endothelial cells in the tumor vessels of subcutaneous B16-F10 melanoma in C57BL/6 mice.** (A) Immunofluorescence analysis of VEGFR-2 expression in B16-F10 tumor. Tumor samples were obtained from C57BL/6 mice bearing 12 days-old subcutaneous B16-F10 tumors. Tumor sections were stained with FITC-conjugated antibody against the endothelial cell marker CD31 expressed on tumor vessels (green) or PE-labeled antibody against VEGFR-2 (red) together with DAPI (blue) to show the nucleus and analyzed using fluorescence microscopy. Yellow represents areas of colocalization of CD31 cell (green) and VEGFR-2 (red) on tumor vessels (10x). Boxed areas in the upper panel of the figure are presented in the bottom panel at higher magnification (40x). (B) FACS analysis of VEGFR-2 expression on B16-F10 tumor tissue. Single cell suspensions were prepared from tumor tissues obtained from C57BL/6 mice bearing 12 days-old subcutaneous B16-F10 tumor and analyzed for cell surface expression of VEGFR-2 by flow cytometry using a PE-labeled rat antibody against mouse VEGFR-2. Filled histogram, VEGFR-2 specific staining; open histogram, staining with the rat IgG2a,  $\kappa$  isotype control antibody. Results shown are representative of two experiments.

# Supplemental Figure S3

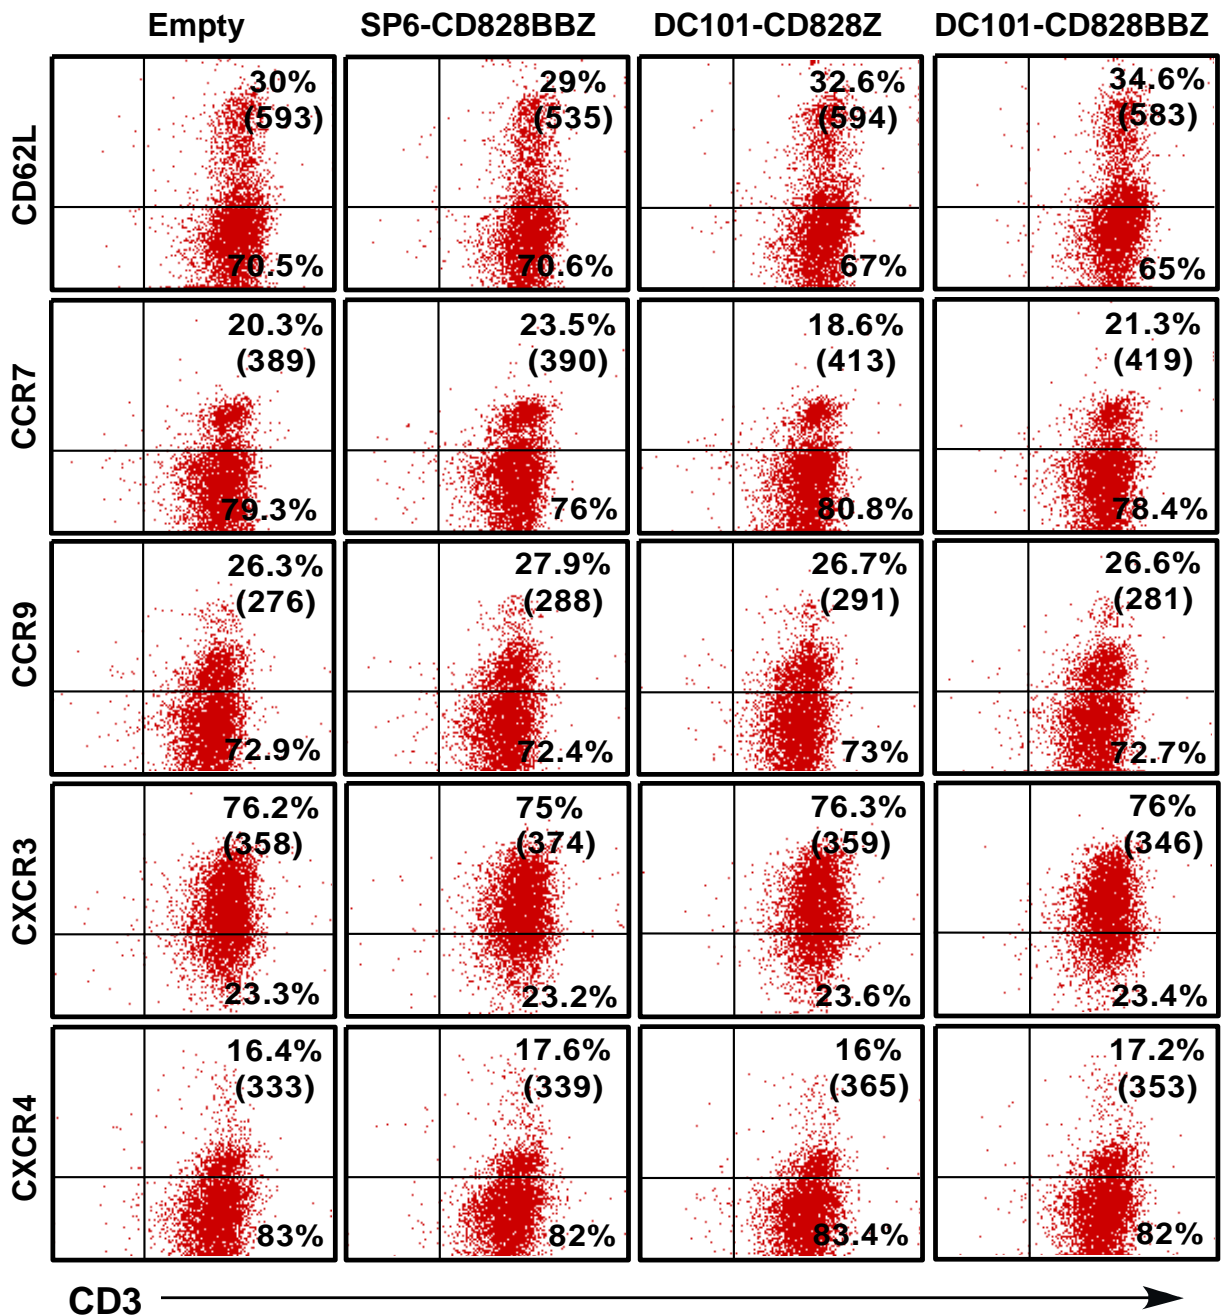

**Figure S3**

**Phenotypic analysis of chemokine receptors expression on transduced mouse T cells.**

Enriched splenic CD3<sup>+</sup> T cells were transduced with the indicated retroviral vectors shown in the Figure. Five days after transduction cells were analysed by FACS for cell surface expression of CD62L molecule and indicated chemokine receptors that are known to be involved in homing and/or efficient trafficking of T cells in vivo. Representative FACS data showing the percentage of T cells in each quadrant with MFI of expression in parentheses are presented.

## Supplemental Figure S4

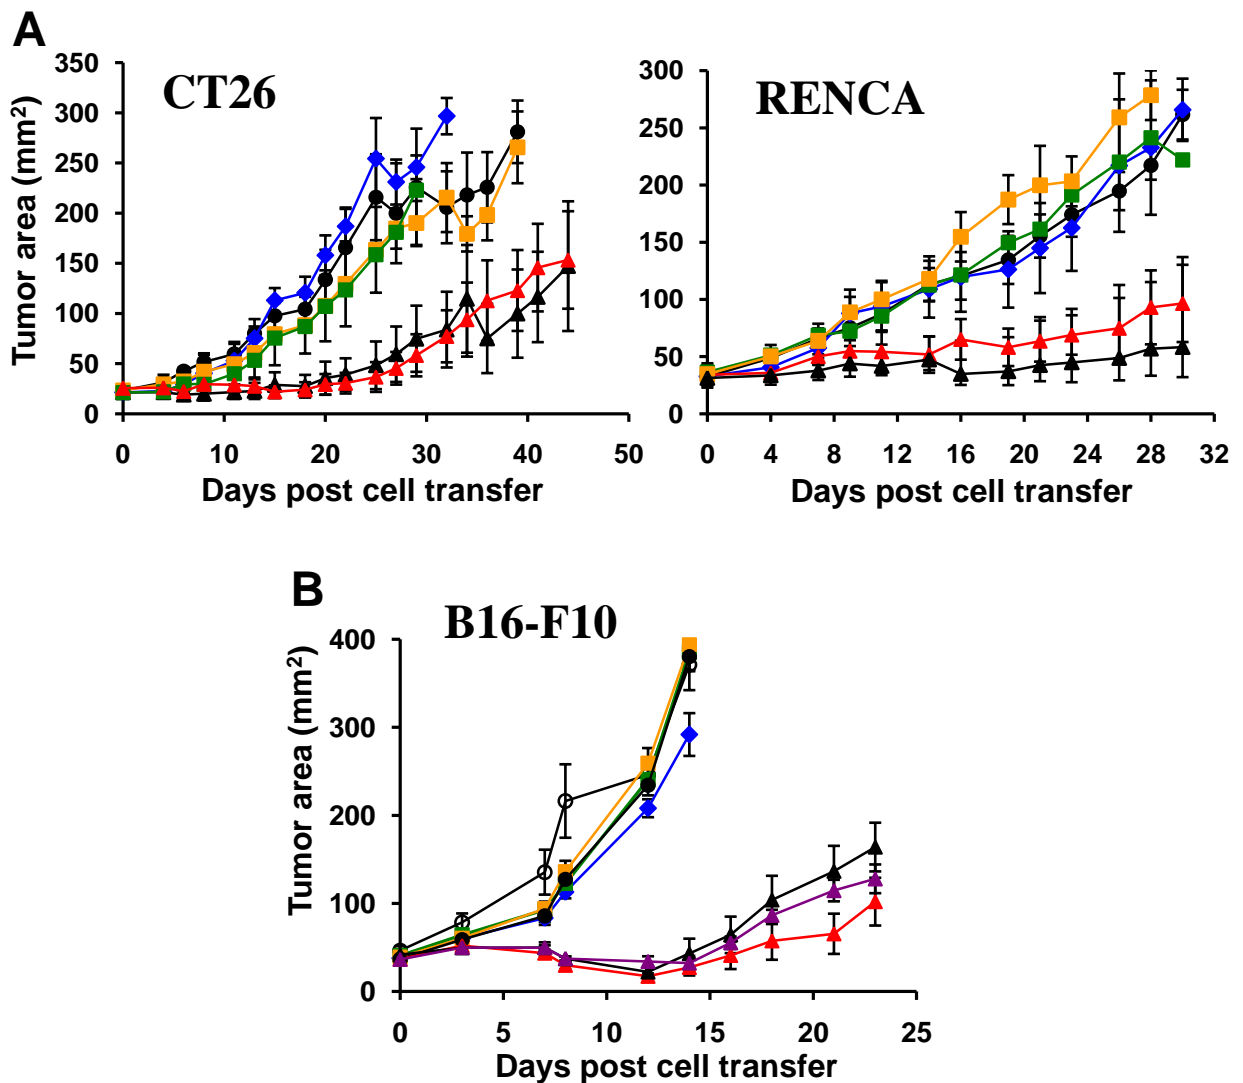

**Figure S4**

**Purified CD8<sup>+</sup> T cells transduced with DC101-CAR inhibited the tumor growth without any toxicity in BALB/c mice bearing established syngeneic tumors.** BALB/c mice bearing established subcutaneous CT26 or RENCA tumors were sublethally irradiated at 5 Gy TBI and treated with a single dose of  $5 \times 10^6$  unseparated CD3<sup>+</sup> T cells transduced with the DC101-CD828BBZ (red triangles) or an empty vector (green squares) or  $2 \times 10^7$  purified CD8<sup>+</sup> T cells transduced with either DC101-CD828BBZ (black triangles) or an empty vector (orange squares). All T cell treatment groups received 2 daily doses of rhIL-2 for 3 days. Control groups received rhIL-2 alone (blue diamonds) or none (black circles). **(B)** C57BL/6 mice bearing 12 days-old subcutaneous B16-F10 melanoma were sublethally irradiated at 5 Gy TBI and treated with a single dose of  $2 \times 10^7$  unseparated CD3<sup>+</sup> T cells transduced with the DC101-CD828BBZ (red triangles) or an empty vector (green squares) or  $2 \times 10^7$  purified CD8<sup>+</sup> T cells transduced with either DC101-CD828BBZ (black triangles) or an empty vector (orange squares). Some groups received a mixture of  $1 \times 10^7$  CD4<sup>+</sup> T cells and  $1 \times 10^7$  CD8<sup>+</sup> T cells transduced with DC101-CD828BBZ (purple triangles) or an empty vector (purple squares). All T cell treatment groups received 2 daily doses of rhIL-2 for 3 days. Control groups received rhIL-2 alone (blue diamonds) or no treatment (black circles).

| PRIMER   | SEQUENCES                               |
|----------|-----------------------------------------|
| 1121S1   | GTGGGGTTCCTCGAGGCCA                     |
| 1121S2   | CCATGGACTTCCAGGTGCAGATCTTCTCTTTCCTGCTG  |
| 1121S3   | ATTAGTGCCTCCGTCATCATGTCCAGAGGCGATATCCA  |
| 1121S4   | GATGACACAGTCCCCAGTTCAGTGTCCGCGTCCATCG   |
| 1121S5   | GGGACCGTGTCAACCATTACCTGTCGCGCCAGTCAAGGC |
| 1121S6   | ATCGACAACCTGGCTGGGGTGGTACCAGCAAAGCCAGG  |
| 1121S7   | GAAGGCGCCAAAAGTCTGATCTATGATGCGAGCAACC   |
| 1121S8   | TCGACACTGGAGTCCCAGTAGGTTCTCCGGATCGGGG   |
| 1121S9   | TCCGGCACGTACTTCACCTTGACCATCTCCAGCCTCCA  |
| 1121S10  | GGCCGAGGATTTTCGCTGTTTACTTCTGCCAGCAGGCAA |
| 1121S11  | AAGCGTTTCCGCCCACCTTCGGCGGGGGCACCAAGGTG  |
| 1121S12  | GACATAAAAGGCAGTACCAGCGGATCCGGCAAGCCGGG  |
| 1121S13  | CTCTGGCGAAGGTTCCGAAGTCCAGTTGGTGCAGTCCG  |
| 1121S14  | GTGGTGGCCTGGTCAAGCCGGGTGGGAGTCTCAGGCTC  |
| 1121S15  | TCCTGCGCCGCTTCAGGGTTCACATTCTCTTCGTATTC  |
| 1121S16  | CATGAACTGGGTGCGCCAGGCGCCAGGCAAGGGGCTGG  |
| 1121S17  | AGTGGGTGAGTTCGATTTCAAGTTCGTCCTCCTACATC  |
| 1121S18  | TATTACGCCGACTCAGTCAAGGGCCGCTTACAATCTC   |
| 1121S19  | CAGAGACAACGCTAAGAACTCGCTGTACCTCCAAATGA  |
| 1121S20  | ACTCGCTGCGCGCCGAAGACACCGCCGTGACTATTGC   |
| 1121S21  | GCGAGAGTGACTGATGCCTTCGACATATGGGGCCAGGG  |
| 1121S22  | AACGATGGTGACCGTGAGTAGTGCGGCCGCAAGAGATC  |
| 1121AS1  | GATCTCTTGCGGCCGCACT                     |
| 1121AS2  | ACTCACGGTCACCATCGTTCCTGGCCCCATATGTCGA   |
| 1121AS3  | AGGCATCAGTCACTCTCGCGCAATAGTACACGGCGGTG  |
| 1121AS4  | TCTTCGGCGCGCAGCGAGTTCATTTGGAGGTACAGCGA  |
| 1121AS5  | GTTCTTAGCGTTGTCTCTGGAGATTGTGAAGCGGCCCT  |
| 1121AS6  | TGACTGAGTCGGCGTAATAGATGTAGGAGGACGAACTT  |
| 1121AS7  | GAAATCGAACTGACCCACTCCAGCCCCTTGCTGGCGC   |
| 1121AS8  | CTGGCGCACCCAGTTCATGGAATACGAAGAGAATGTGA  |
| 1121AS9  | ACCCTGAAGCGGCGCAGGAGAGCCTGAGACTCCCACCC  |
| 1121AS10 | GGCTTGACCAGGCCACCACCGGACTGCACCAACTGGAC  |
| 1121AS11 | TTCGGAACCTTCGCCAGAGCCCAGGCTTGCCGGATCCGC |
| 1121AS12 | TGGTACTGCCTTTTATGTCCACCTTGGTGGCCCCGCGC  |
| 1121AS13 | AAGGTGGGCGGAAACGCTTTTGCCTGCTGGCAGAAGTA  |
| 1121AS14 | AACAGCGAAATCCTCGGCCTGGAGGCTGGAGATGGTCA  |
| 1121AS15 | AGGTGAAGTACGTGCCGACCCCGATCCGGAGAACCTA   |
| 1121AS16 | CTGGGGACTCCAGTGTGAGGTTGCTCGCATCATAGAT   |
| 1121AS17 | CAGCAGTTTTGGCGCCTTCCCTGGCTTTTGGTGGTACC  |
| 1121AS18 | ACCCAGCCAGTTGTCGATGCCTTGACTGGCGCGACAG   |
| 1121AS19 | GTAATGGTGACACGGTCCCCGATGGACGCGGACACTGA  |
| 1121AS20 | ACTGGGGGACTGTGTCATCTGGATATCGCCTCTGGACA  |
| 1121AS21 | TGATGACGGAGGCACTAATCAGCAGGAAAGAGAAGATC  |
| 1121AS22 | TGCACCTGGAAGTCCATGGTGGCCTCGAGGACCCCCAC  |

**Figure S5**

**Primers used to synthesis KDR1121 scFv.** The KDR ScFv containing the mouse IgG kappa chain leader sequence followed by the codon optimized  $V_L$  and  $V_H$  sequences derived from KDR-1121 antibody linked by a 218 bp linker was designed using a web-based DNA codon optimization algorithm software and synthesized using the primer sequences shown in the figure.

## Supplemental Table S1

**Table S1. Retroviral mediated expression of chimeric antigen receptors (CAR) in primary mouse T lymphocytes**

|        |                                   | DC101-CD8   | DC101-CD828Z | DC101-CD828BBZ | SP6-CD828BBZ |
|--------|-----------------------------------|-------------|--------------|----------------|--------------|
| % Tdxn | CD3 <sup>+</sup> CD4 <sup>+</sup> | 83.2 ± 1.9  | 84 ± 1.7     | 79.0 ± 4.5     | 84.8 ± 2.7   |
|        | CD3 <sup>+</sup> CD8 <sup>+</sup> | 80.8 ± 2.1  | 86 ± 1.6     | 78.2 ± 5.1     | 84.2 ± 3.9   |
| MFI    | CD3 <sup>+</sup> CD4 <sup>+</sup> | 114.3 ± 7.8 | 95 ± 7.3     | 76.5 ± 4.9     | 86.8 ± 6.1   |
|        | CD3 <sup>+</sup> CD8 <sup>+</sup> | 108.5 ± 9.4 | 92 ± 6.2     | 75.8 ± 5.6     | 83.5 ± 4.8   |

**Table S1.** Transduction efficiency of primary mouse T lymphocytes by CAR-expressing retroviral vectors. Enriched mouse splenic CD3<sup>+</sup> T cells were transduced with indicated retroviral vectors. Transduction efficiency and level of expression of CAR in transduced mouse T cells were determined on day 4 post-transduction by flow cytometry and presented as percent transduction (% Tdxn) and mean fluorescent intensity of expression (MFI) in the CD4<sup>+</sup> and CD8<sup>+</sup> T cell subsets. Data shown are mean ± SEM derived from 5 different experiments.
